# Supplementary material for: Locally Recurrent Rectal Cancer According to a Standardized MRI Classification System: A Systematic Review of the Literature
Source: MDPI journal article supplement (doi:10.3390/jcm11123511), 2022-06-18

## Supplementary Table S1. Patient demographics and treatment information

| Study                                      | Country   | Years of study | Type of cohort study | Recurrences only included in study Y/N | Mean or median age (years) (Total population (TP) or recurrences (R)) | No. of patients followed / included in study | Male : Female (TP or R) | Stage of primary tumours (TP or R)                                                                             | Lymph node status (TP or R)                 | Perioperative treatment of primary tumour (TP or R)                                                                                                                | No. of local recurrences (included / classified) | Method of diagnosis of recurrence                             | Classification system used                                                                           | Operation performed for primary cancer leading to recurrence (TP or R)                                                                            |
|--------------------------------------------|-----------|----------------|----------------------|----------------------------------------|-----------------------------------------------------------------------|----------------------------------------------|-------------------------|----------------------------------------------------------------------------------------------------------------|---------------------------------------------|--------------------------------------------------------------------------------------------------------------------------------------------------------------------|--------------------------------------------------|---------------------------------------------------------------|------------------------------------------------------------------------------------------------------|---------------------------------------------------------------------------------------------------------------------------------------------------|
| Adachi et al. 1999 <sup>(18)</sup>         | Japan     | 11             | Retrospective        | N                                      | (R): 61.9                                                             | 135                                          | (R): 4M : 5F            | Depth of invasion (R): Shallow part of adventitia = 5<br>Submucosa = 1<br>Muscularis propria = 3               | (R): N-ve = 2<br>N+ve = 7                   | Not reported                                                                                                                                                       | 21 (10)                                          | Clinical and radiological                                     | Anatomical                                                                                           | (R): Pull-through = 2<br>LAR = 5<br>APER = 2                                                                                                      |
| Adloff M et al. 1985 <sup>(19)</sup>       | France    | 7              | Prospective          | N                                      | (R): 66                                                               | 113                                          | (R): 10M : 26F          | Dukes stage (R): B = 16<br>C = 20                                                                              | (R): N-ve = 21<br>N+ve = 15                 | Not reported                                                                                                                                                       | 36 (36)                                          | Clinical/radiological/histopathological                       | Anatomical                                                                                           | (R): APER = 36                                                                                                                                    |
| Baek JY et al. 2017 <sup>(20)</sup>        | Seoul     | 9              | Retrospective        | N                                      | (TP): 67                                                              | 122                                          | (TP): 67M : 55F         | (R): pT3 = 6                                                                                                   | (R): pN0 = 6                                | (R): No neoadjuvant/adjuvant treatment = 6                                                                                                                         | 6 (6)                                            | Clinical/radiological/histopathological                       | Regional anatomical                                                                                  | (TP): APER: = 2<br>LAR: 120                                                                                                                       |
| Beppu N et al. 2017 <sup>(21)</sup>        | Japan     | 12             | Retrospective        | N                                      | (TP): 63.5                                                            | 119                                          | (TP): 84M :35F          | TNM (R): T3 = 9                                                                                                | (TP): N -ve = 44<br>N+ve = 75               | (R): Neoadjuvant radiotherapy = 9                                                                                                                                  | 9 (9)                                            | Clinical/radiological/histopathological                       | Regional anatomical                                                                                  | (R): Intersphincteric resection = 6<br>APER = 3                                                                                                   |
| Beppu N et al. 2018 <sup>(22)</sup>        | Japan     | 13             | Retrospective        | N                                      | (TP): 62                                                              | 216                                          | (TP): 144M : 72F        | (R): T3 = 16                                                                                                   | (TP): N-ve = 156<br>N+ve = 60               | (R): Neoadjuvant short-course radiotherapy = 16                                                                                                                    | 16 (16)                                          | Clinical/biochemical/radiological (confirmed with MRI/PET-CT) | Regional anatomical                                                                                  | (TP): <b>All TME:</b><br>Double-stapling technique = 94<br>Intersphincteric resection = 106<br>APER = 14<br>Hartmann's = 2<br>Additional PSD = 13 |
| Bikhchandani J et. al 2015 <sup>(23)</sup> | USA       | 16             | Retrospective        | Y                                      | (R): 66                                                               | 27                                           | (R): 9M : 18F           | TNM (R): Tx = 2<br>Tis = 2<br>T1 = 16<br>T2 = 7                                                                | (R): N0 = 7<br>Unknown = 20                 | Not reported                                                                                                                                                       | 32 (32)                                          | EUS/MRI                                                       | Anatomical                                                                                           | (R): LE = 27                                                                                                                                      |
| Bird T et al. 2018 <sup>(24)</sup>         | Australia | 19             | Prospective          | Y                                      | (R): 63                                                               | 98                                           | (R): 61M : 37F          | TNM (R): T1-T2 N0 = 14,<br>T3N0 = 26,<br>T2N+ve = 2,<br>T3N+ve = 21,<br>T4N0 = 9,<br>T4N+ = 6,<br>Unknown = 20 | (R): N-ve = 49<br>N+ve = 29<br>Unknown = 20 | (R): <b>Adjuvant chemotherapy:</b><br>Yes = 45<br>No = 48<br>Unknown = 5<br><b>Chemoradiation:</b><br>Neoadjuvant = 34<br>Adjuvant = 6<br>None = 57<br>Unknown = 1 | 98 (98)                                          | Radiological (MRI/CT/PET-CT)                                  | Yamada <sup>(8)</sup> and regional anatomical                                                        | (R): Sphincter-preserving = 79<br>Non-sphincter-preserving = 19                                                                                   |
| Boyle K et al. 2005 <sup>(12)</sup>        | UK        | 7              | Retrospective        | Y                                      | (R): 56                                                               | 64                                           | (R): 38M : 26F          | Dukes (R): A = 8<br>B=19<br>C=26<br>Unknown = 11                                                               | Not reported                                | Not reported                                                                                                                                                       | 64 (64)                                          | Clinical/operative/radiological/histopathological             | Regional anatomical (Leeds group) <sup>(21)</sup> and Symptoms & fixity (Mayo clinic) <sup>(7)</sup> | (R): AR = 35<br>APER = 22<br>Proctectomy with end colostomy = 5<br>Total colectomy & end ileostomy = 1<br>Resection of rectal stump = 1           |
| Brown W et al. 2017 <sup>(25)</sup>        | Australia | 4              | Retrospective        | Y                                      | (R): 60                                                               | 62                                           | (R): 40M :22F           | Not reported                                                                                                   | Not reported                                | (R): Radiotherapy alone = 9<br>Chemotherapy only = 2<br>Chemoradiotherapy = 30<br>None = 11<br>Unknown = 10                                                        | 164 (164)                                        | 2 of the following: MRI/Pet-CT/CEA/clinical assessment        | Anatomical                                                                                           | (R): APER = 15<br>Non- APER = 47                                                                                                                  |
| Choi SH et al. 2018 <sup>(26)</sup>        | Korea     | 7              | Retrospective        | N                                      | Not reported                                                          | 826                                          | (TP): 500M : 326F       | TNM (R): T1-2/N0 = 9<br>T3N0 = 8<br>T3/N1 = 2<br>T3/N2 = 6<br>T4/N1 = 1<br>T4/N2 = 2                           | (R): N0 = 17<br>N1 = 3<br>N2 = 8            | No radiotherapy = 826                                                                                                                                              | 108 (31)                                         | MRI                                                           | Anatomical                                                                                           | (R): Curative TME = 28                                                                                                                            |

|                                           |                 |            |               |   |                                 |                                      |                   |                                                                          |                                                                                |                                                                                                                                                      |                                      |                                                                         |                                                                |                                                                                         |
|-------------------------------------------|-----------------|------------|---------------|---|---------------------------------|--------------------------------------|-------------------|--------------------------------------------------------------------------|--------------------------------------------------------------------------------|------------------------------------------------------------------------------------------------------------------------------------------------------|--------------------------------------|-------------------------------------------------------------------------|----------------------------------------------------------------|-----------------------------------------------------------------------------------------|
| Dresen R et al. 2010 <sup>(27)</sup>      | The Netherlands | 3          | Retrospective | Y | (R): 61                         | 40                                   | (R): 26M : 14F    | Not reported                                                             | Not reported                                                                   | (R): Neoadjuvant therapy: No = 13 Short course RT = 17 Long course RT = 10                                                                           | 49 (49)                              | MRI                                                                     | Anatomical                                                     | (R): APER = 15 LAR = 25                                                                 |
| Even-Sapir E et al. 2004 <sup>(28)</sup>  | Israel          | Not stated | Retrospective | N | (TP): 62                        | 62                                   | (TP): 37M : 25F   | Not reported                                                             | Not reported                                                                   | (TP): Neoadjuvant chemoradiotherapy = 7 Adjuvant chemotherapy = 16 Adjuvant radiotherapy = 3                                                         | 44 (44)                              | Clinical/radiological (CT,PET-CT,MRI,EUS)/endoscopy/histopathology      | Anatomical                                                     | (TP): 17 = APER 45 = AR with pelvic anastomosis                                         |
| Fujii S et al. 2009 <sup>(29)</sup>       | Japan           | 20         | Retrospective | Y | (R): 59                         | 61                                   | (R): 39M : 22F    | Not reported                                                             | Not reported                                                                   | Not reported                                                                                                                                         | 61 (61)                              | Not reported                                                            | Regional anatomical                                            | Primary operative procedure not stated                                                  |
| Gilbertsen V et al. 1960 <sup>(69)</sup>  | USA             | 10         | Prospective   | N | (R): 57.4                       | 89                                   | (R): 21M : 11F    | Dukes (R): A = 4 B = 4 C = 20 Unknown = 4                                | (R): N-ve = 8 N+ve = 20 Unknown = 4                                            | Not reported                                                                                                                                         | 39 (39)                              | Histopathological (Biopsy/surgical exploration/autopsy)                 | Anatomical                                                     | (R): APER = 32                                                                          |
| Gleeson F et al. 2012 <sup>(30)</sup>     | USA             |            | Retrospective | N | (TP): 67                        | 155                                  | (TP): 98M : 57F   | TNM (TP): PT0 = 44 pT1 = 61 pT2 = 38 pT3 = 11 pT4 = 1                    | Not reported                                                                   | (TP): Neoadjuvant therapy = 6                                                                                                                        | 16 (16)                              | Clinical/CEA/radiological (CT,MRI,EUS),histopathological                | Anatomical                                                     | (R): Transanal LE = 16                                                                  |
| Hahnloser D et al. 2003 <sup>(31)</sup>   | USA             | 15         | Retrospective | Y | (R): 60.8                       | 304                                  | (R): 192M : 112F  | Astler-Coller (R): A=15 B1=54 B2=76 B3=15 C1=19 C2=72 C3=15 Unknown = 38 | (R): N-ve = 160 N+ve = 106 Unknown = 38                                        | Not reported                                                                                                                                         | 304 (304)                            | CT/MRI/endoscopy/clinical                                               | Symptoms & fixity (Mayo Clinic) <sup>(7)</sup>                 | (R): Sphincter-preserving = 200 Stoma = 104                                             |
| Hasegawa S et al. 2016 <sup>(32)</sup>    | Japan           | 8          | Retrospective | N | (TP): 64.8                      | 212 (207 with previous R0 resection) | (TP): 145M : 67F  | UICC (R): I = 2 II = 16                                                  | (R) of 11 patients with LR other than pelvic sidewall nodes: N-ve = 2 N+ve = 9 | (TP): <b>Neoadjuvant treatment:</b> Chemotherapy = 30 Chemoradiotherapy = 7 In those with R0 resection: <b>Adjuvant treatment:</b> Chemotherapy = 81 | 19 (19)                              | Tumour markers/clinical examination/colonoscopy/contrast enema/CT/MRI   | Regional anatomical                                            | (TP): Sphincter-preserving = 178 Non-sphincter-preserving = 34 (PSD = 18, no PSD = 194) |
| Hruby G et al. 2003 <sup>(33)</sup>       | New Zealand     | 13         | Retrospective | Y | (R): 70                         | 269                                  | (R): 150M : 119F  | TNM (R): T1 = 4 T2 = 29 T3 = 198 T4 = 23 Unknown = 15                    | (R): N-ve = 129 N+ve = 140                                                     | (R): No radiotherapy = 269 Adjuvant chemotherapy = 36                                                                                                | 268 (267)                            | (R): Biopsy = 156 Combination of radiological/clinical findings = 113   | Regional anatomical (Hruby) <sup>(31)</sup>                    | (R): APER = 100 LE = 8 LAR = 154 Other = 6 Unknown = 1                                  |
| Ingle P et al. 2019 <sup>(33)</sup>       | India           | 3          | Retrospective | Y | (R): 30                         | 10                                   | (R): 2M           | TNM (R): T3 = 2                                                          | (R): N1 = 2                                                                    | (R): Neoadjuvant treatment: Chemoradiotherapy then chemotherapy = 1 Short course radiotherapy = 1                                                    | 2 (2)                                | Not reported                                                            | Anatomical                                                     | (R): APER = 1 Intersphincteric resection = 1                                            |
| Iversen H et al. 2017 <sup>(68)</sup>     | Sweden          | 10         | Retrospective | Y | (R): 65                         | 95                                   | (R): 59M : 36F    | Not reported                                                             | Not reported                                                                   | (R): Neoadjuvant radiotherapy = 54                                                                                                                   | 184 (184)                            | MRI                                                                     | Regional anatomical (Memorial Sloan Kettering) <sup>(10)</sup> | Primary operative procedure not stated                                                  |
| Kanemitsu Y et al. 2010 <sup>(34)</sup>   | Japan           | 25         | Retrospective | Y | (R): 57                         | 101                                  | (R): 57M : 44F    | Dukes (R): A = 18 B = 21 C = 52 D = 5 Unknown = 5                        | (R): N-ve = 39 N+ve = 52 Unknown = 10                                          | (R): Adjuvant treatment: Chemotherapy = 33 Radiotherapy = 3                                                                                          | 101 (101)                            | CEA/PET CT/CT-guided biopsy/MRI (MRI for location of pelvic recurrence) | Reginal anatomical Modified Yamada <sup>(6)</sup>              | (R): LE = 4 HAR = 15 LAR = 46 APR = 32 Hartmann's = 4                                   |
| Killingback M et al. 2001 <sup>(35)</sup> | Australia       | 30         | Prospective   | N | (TP): Male = 61.3 Female = 61.9 | 532                                  | (TP): 304M : 228F | Dukes (R): A = 5 B = 6 C = 30                                            | (R): N-ve = 11 N+ve = 30                                                       | (TP): <b>Radiotherapy:</b> ^ Neoadjuvant = 28 Adjuvant = 5 Adjuvant chemotherapy = 1                                                                 | Sphincter-saving resections: 49 (49) | Clinical examination & CT                                               | Anatomical                                                     | (TP): APER = 58 Sphincter-saving resection = 472 Proctocolectomy = 2 (R): HAR = 1       |

|                                             |                                        |               |               |   |               |                                                              |                                                                                                |                                                                                                                                                                                            |                                                                                                                                         |                                                                                                                                                                                            |                                                                                              |                                                              |                                                                             |                                                                                                                                                  |
|---------------------------------------------|----------------------------------------|---------------|---------------|---|---------------|--------------------------------------------------------------|------------------------------------------------------------------------------------------------|--------------------------------------------------------------------------------------------------------------------------------------------------------------------------------------------|-----------------------------------------------------------------------------------------------------------------------------------------|--------------------------------------------------------------------------------------------------------------------------------------------------------------------------------------------|----------------------------------------------------------------------------------------------|--------------------------------------------------------------|-----------------------------------------------------------------------------|--------------------------------------------------------------------------------------------------------------------------------------------------|
|                                             |                                        |               |               |   |               |                                                              |                                                                                                |                                                                                                                                                                                            |                                                                                                                                         |                                                                                                                                                                                            |                                                                                              |                                                              |                                                                             | LAR = 6<br>Extended LAR = 5<br>AR with coloanal<br>anastomosis = 3<br>Unknown = 26                                                               |
| Kim T et al.<br>2008 <sup>(36)</sup>        | Korea                                  | 4             | Prospective   | N | (TP):<br>57   | 366                                                          | (TP):<br>247M : 119F                                                                           | TNM (TP):<br>cT3 = 354<br>cT4 = 12<br><br>ypT0 = 53<br>ypTis = 2<br>ypT1 = 19<br>ypT2 = 96<br>ypT3 = 182<br>ypT4 = 14<br><br>(R):<br>ypT<3 = 5<br>ypT≥3 = 19<br>Unknown = 5                | (TP):<br>cN-ve = 58<br>cN +ve = 308<br><br>ypN0 = 250<br>ypN1 = 79<br>ypN2 = 37<br><br>(R):<br>ypN-ve = 8<br>ypN+ve = 16<br>Unknown = 5 | (TP):<br>Neoadjuvant<br>chemoradiotherapy = 366<br><br>Adjuvant chemotherapy =<br>357<br><br>(R):<br>Neoadjuvant chemotherapy =<br>24<br><br>Adjuvant chemotherapy = 23<br><br>Unknown = 5 | 30 (30)                                                                                      | Clinical/radiological (CT/MRI)/histopathological             | Regional anatomical                                                         | (TP):<br>Sphincter-preserving = 303<br>APER = 63<br><br>(R):<br>Sphincter-preserving = 18<br>APER = 6<br>Unknown = 5                             |
| Kim T et al.<br>2014 <sup>(37)</sup>        | Korea                                  | 10            | Prospective   | N | Not reported  | 443                                                          | (TP):<br>292 M : 151 F                                                                         | TNM (TP):<br>T1/2 = 26<br>T3/4 = 417                                                                                                                                                       | (TP):<br>N0 = 132<br>N+ve = 311                                                                                                         | (TP):<br>Neoadjuvant<br>chemoradiotherapy = 443<br><br>Adjuvant chemotherapy =<br>383                                                                                                      | 53 (53)                                                                                      | Biopsy/surgery/clinical imaging analysis (CT/PET-<br>CT/MRI) | Regional anatomical                                                         | (TP):<br>APER = 77<br>LAR = 366                                                                                                                  |
| Kusters M et<br>al. 2009 <sup>(38)</sup>    | <b>Japan *</b><br>& The<br>Netherlands | 9             | Retrospective | N | (TP):<br>58   | 324                                                          | (TP):<br>215M : 109F                                                                           | (TP):<br>pT1 = 52<br>pT2 = 107<br>pT3 = 160<br>pT4 = 5                                                                                                                                     | (TP):<br>pN0 = 192<br>pN1 = 80<br>pN2 = 52                                                                                              | (TP):<br>Neoadjuvant therapy = 0<br><br><b>Adjuvant therapy:</b><br>Radiotherapy = 5<br>Chemotherapy = 23<br>None = 297                                                                    | 23 (21)                                                                                      | Clinical/radiological/histopathological                      | Regional anatomical (Kusters<br><sup>(39)</sup> and Roels <sup>(40)</sup> ) | (TP):<br>APER = 113<br>Hartmann's = 3<br>LAR = 195<br>PE = 13<br><br>LLND:<br>Standard TME = 134<br>Unilateral LLND = 69<br>Bilateral LLND = 121 |
| Kusters M et<br>al. 2009 <sup>(39)</sup>    | The<br>Netherlands                     | 12            | Prospective   | N | (TP):<br>63   | 290 (247 with<br>previous R0<br>resection)                   | (TP):<br>179M : 111F                                                                           | (TP):<br>cT3+ = 113<br>cT4 = 177                                                                                                                                                           | Not reported                                                                                                                            | (TP):<br><b>Neoadjuvant treatment:</b><br><br>RT only = 86<br>Chemoradiotherapy = 204<br><br>IORT = 290<br><br>Adjuvant chemotherapy = 39                                                  | <b>Out of 247 patients<br/>with R0 resection:</b><br><br><b>18 (18)</b><br><br>[34 LR in TP] | Clinical/radiological/histopathological                      | Regional anatomical<br>(Kusters) <sup>(39)</sup>                            | (TP):<br>APER = 138<br>Abdominotranssacral<br>resection = 12<br>LAR = 132<br>PE = 8                                                              |
| Kusters M et<br>al. 2010 <sup>(40)</sup>    | The<br>Netherlands                     | Not<br>stated | Prospective   | N | (R):<br>65    | 1417                                                         | (R):<br>69M : 45F                                                                              | TNM (R):<br>pT2 = 15<br>pT3 = 90<br>pT4 = 9                                                                                                                                                | (R):<br>pN0 = 29<br>pN1 = 46<br>pN2 = 39                                                                                                | (R):<br>Neoadjuvant radiotherapy:<br>Yes = 36<br>No = 78                                                                                                                                   | 114 (114)                                                                                    | Clinical/radiological/histopathological                      | Regional anatomical<br>(Kusters) <sup>(39)</sup>                            | (R):<br>APER = 47<br>Hartmann = 6<br>LAR = 61                                                                                                    |
| Lambrechts D et<br>al. 2011 <sup>(41)</sup> | Netherlands                            | 3             | Retrospective | Y | (R):<br>68    | 42 (33 R0<br>resections)                                     | (TP):<br>26M : 16F<br>(R):<br>13M : 6F                                                         | Not reported                                                                                                                                                                               | Not reported                                                                                                                            | (TP):<br>Radiotherapy = 7<br>Neoadjuvant chemo+/-<br>radiotherapy = 26<br><br>(R):<br>Radiotherapy = 2<br>Neoadjuvant chemo+/-<br>radiotherapy = 11                                        | 19 (19)                                                                                      | MRI                                                          | Anatomical                                                                  | (TP):<br>TME = 36<br>TEMS = 6<br><br>(R):<br>TME = 14<br>TEMS = 5                                                                                |
| Luna-Perez P<br>et al. 1999 <sup>(42)</sup> | Mexico                                 | 18            | Prospective   | N | (TP):<br>56.8 | 412<br><br><b>Group 1:</b> 259<br><br><b>Group 2:</b><br>153 | (TP):<br>230M : 182F<br><br><b>Group 1:</b><br>142M : 117F<br><br><b>Group 2:</b><br>88M : 65F | <b>Astler-Coller and<br/>Gunderson-Sosin</b> If<br>tumour infiltrated into<br>pelvic viscera<br>(TP):<br><br><b>Group 1:</b><br>No residual tumour =<br>12<br>A = 38<br>B1 = 37<br>B2 = 85 | (TP):<br><b>Group 1:</b><br>N-ve = 183<br>N+ve = 64<br>Unknown = 12<br><br><b>Group 2:</b><br>N-ve = 99<br>N+ve = 54                    | (TP):<br>Group 1 (neoadjuvant<br>radiotherapy) = 259<br><br>(R):<br>Neoadjuvant RTx = 32                                                                                                   | 86 (85<br>(group 1 = 31, group 2<br>= 54)                                                    | CT                                                           | Anatomical                                                                  | (TP):<br>Group 1:<br>APER = 149<br>LAR = 74<br>PE = 36<br><br>Group 2:<br>APER = 62<br>LAR = 82<br>PE = 9                                        |

|                                          |           |    |               |   |                                      |                                                                                       |                                          |                                                                                                                                          |                                                                                                         |                                                      |                                                                     |                                                                                           |                                                                   |                                                                                                                                                                                                 |
|------------------------------------------|-----------|----|---------------|---|--------------------------------------|---------------------------------------------------------------------------------------|------------------------------------------|------------------------------------------------------------------------------------------------------------------------------------------|---------------------------------------------------------------------------------------------------------|------------------------------------------------------|---------------------------------------------------------------------|-------------------------------------------------------------------------------------------|-------------------------------------------------------------------|-------------------------------------------------------------------------------------------------------------------------------------------------------------------------------------------------|
|                                          |           |    |               |   |                                      |                                                                                       |                                          | B3 = 23<br>C1 = 23<br>C2 = 28<br>C3 = 13<br><br><b>Group 2:</b><br>A = 12<br>B1 = 14<br>B2 = 66<br>B3 = 7<br>C1 = 5<br>C2 = 42<br>C3 = 7 |                                                                                                         |                                                      |                                                                     |                                                                                           |                                                                   |                                                                                                                                                                                                 |
| McDermott FT et al. 1985 <sup>(43)</sup> | Australia | 33 | Prospective   | N | (TP):<br>Male= 59.1<br>Female = 60.9 | 1008                                                                                  | (TP):<br>552M : 456F                     | Astler-Coller (TP):<br>A = 276<br>B = 350<br>C1 = 285<br>C2 = 25<br>C unspecified = 7<br>D1 = 10<br>Unknown = 55                         | (TP):<br>N-ve = 626<br>N+ve = 317<br>Unknown = 65                                                       | Not reported                                         | 320 (320)                                                           | Not reported                                                                              | Anatomical                                                        | (TP):<br>Restorative resection = 644<br>Total excision = 364                                                                                                                                    |
| Mendenhall W et al. 1983 <sup>(44)</sup> | USA       | 17 | Retrospective | N | Not stated                           | 90                                                                                    | Not stated                               | Astler-Coller (R):<br>B1=6<br>B2=12<br>C1=12<br>C2=11                                                                                    | (R):<br>N-ve = 18<br>N+ve = 23                                                                          | (TP):<br>Surgery alone = 90                          | 42 (41)                                                             | Clinical/radiological/histopathological                                                   | Anatomical                                                        | (TP):<br>APER = 54<br>AR = 28<br>Other = 7 (Hartmann's,<br>partial colectomy, transverse<br>colostomy, transrectal<br>excision)<br><br>(R):<br>APER = 24<br>AR = 11<br>Other = 5<br>Unknown = 1 |
| Messiou C et al. 2008 <sup>(45)</sup>    | UK        | 6  | Prospective   | Y | (R):<br>57.1                         | 49                                                                                    | (R):<br>28M : 21F                        | Not reported                                                                                                                             | Not reported                                                                                            | (R):<br>Perioperative radiotherapy = 17              | 75 (75)                                                             | MRI/ tumour markers/Biopsy (image-guided/colonoscopic/EUA)                                | Anatomical                                                        | (R):<br>APER = 19<br>AR = 25,<br>Excision of rectal stump = 1<br>Transanal excision = 4                                                                                                         |
| Moore H et al. 2004 <sup>(9)</sup>       | USA       | 6  | Retrospective | Y | (TP):<br>59                          | 119<br>(101 pelvic recurrence of rectal cancer, 18 pelvic recurrence of colon cancer) | (TP)<br>64M: 55F                         | TNM (TP): **<br>T0-2 = 37<br>T3-4 = 71                                                                                                   | (TP): **<br>N0-X = 66<br>N1-2 = 46                                                                      | (TP):<br>Adjuvant radiotherapy +/- chemotherapy = 59 | (R):<br>In 101 pelvic recurrence of rectal cancer:<br><br>174 (174) | Retrospectively established by review of operative & histopathological reports            | Regional anatomical<br>(Memorial Sloan-Kettering) <sup>(10)</sup> | (R):<br>In 101 pelvic recurrence of rectal cancer:<br>APER = 15<br>LAR = 77<br>TAE = 8<br>Kraske = 1                                                                                            |
| Nagasaki T et al. 2014 <sup>(46)</sup>   | Japan     | 8  | Retrospective | Y | Not reported                         | 30                                                                                    | (R):<br>Lap - 9M : 4F<br>Open - 12M : 5F | JSCCR (R):<br>Lap:<br>I = 2<br>II = 4<br>III = 6<br>IV = 1<br><br>Open:<br>I = 4<br>II = 3<br>III = 7<br>IV = 3                          | (R):<br>Lap:<br>N-ve = 6<br>N+ve = 6<br>Unknown = 1<br><br>Open:<br>N-ve = 7<br>N+ve = 7<br>Unknown = 3 | (R):<br>Adjuvant chemotherapy<br>Lap = 6<br>Open = 9 | 30 (30)                                                             | Not reported                                                                              | Anatomical                                                        | (R):<br><b>Lap:</b><br>LAR = 11<br>LAR with LLND = 1<br>Subtotal colectomy = 1<br><b>Open:</b><br>LAR = 14<br>APER = 2<br>Intersphincteric resection = 1                                        |
| Novell F et al. 1997 <sup>(47)</sup>     | Spain     | 7  | Prospective   | N | (TP):<br>67                          | 140                                                                                   | (TP):<br>66M : 74 F                      | TNM (R):<br>T3-4, N0 = 5<br>T2-T4, N1 = 16                                                                                               | (R):<br>N0 = 5<br>N1 = 16                                                                               | Not reported                                         | 21 (21)                                                             | (TP):<br>EUS & biopsy = 140<br>DRE= 14<br>Colonoscopy = 16<br>CT Abdomen = 18<br>CEA = 13 | Anatomical                                                        | (R):<br>AR = 21                                                                                                                                                                                 |
| Pergolizzi S et al. 1999 <sup>(48)</sup> | Italy     | 7  | Retrospective | Y | (R):<br>64.5                         | 39                                                                                    | (R):<br>24M : 15F                        | Dukes (R):<br>A = 13<br>B = 14<br>C = 12                                                                                                 | (R):<br>N-ve = 27<br>N+ve = 12                                                                          | (R):<br>No previous perioperative treatment = 39     | 39 (39)                                                             | Clinical/radiological/histopathological                                                   | Anatomical                                                        | (R):<br>19 = APER<br>20 = AR                                                                                                                                                                    |

|                                         |                 |     |               |   |               |                                      |                                            |                                                                                                                                                    |                                                                     |                                                                                                                                                                                                                                      |           |                                                     |                                                                                      |                                                                                                                                                         |
|-----------------------------------------|-----------------|-----|---------------|---|---------------|--------------------------------------|--------------------------------------------|----------------------------------------------------------------------------------------------------------------------------------------------------|---------------------------------------------------------------------|--------------------------------------------------------------------------------------------------------------------------------------------------------------------------------------------------------------------------------------|-----------|-----------------------------------------------------|--------------------------------------------------------------------------------------|---------------------------------------------------------------------------------------------------------------------------------------------------------|
| Pilipshen S et al. 1984 <sup>(11)</sup> | USA             | 8   | Prospective   | N | (TP):<br>62   | 412                                  | (TP):<br>243M : 169F                       | Dukes (R):<br>A = 18<br>B = 32<br>C = 55                                                                                                           | (R):<br>N-ve = 50<br>N+ve = 55                                      | (TP):<br>Neoadjuvant irradiation = 113<br>Adjuvant irradiation = 17<br><br>(R):<br>Neoadjuvant irradiation = 33                                                                                                                      | 105 (105) | Clinical/biochemical/radiological/histopathological | Regional anatomical +/- fixation (Previous Memorial Sloan Kettering) <sup>(50)</sup> | (R):<br>APER = 39<br>LAR = 66                                                                                                                           |
| Rahbari N et al. 2011 <sup>(49)</sup>   | Germany         | 7.5 | Prospective   | Y | (R):<br>62    | 92                                   | (TP):<br>62M : 30F                         | UICC (R):<br>I = 17<br>II = 33<br>III = 35<br>IV = 7                                                                                               | (R):<br>N-ve = 50<br>N+ve = 35<br>Unknown = 7                       | (R):<br>Previous (chemo)radiotherapy = 51                                                                                                                                                                                            | 92 (92)   | Clinical/endoscopic/radiological/histopathological  | Regional anatomical                                                                  | (R):<br>Sphincter-preserving = 71<br>Non-sphincter-preserving = 21                                                                                      |
| Rich T et al. 1983 <sup>(50)</sup>      | USA             | 4   | Retrospective | N | Not reported  | 166 (142 with curative resection)*** | (TP):<br>99M : 67 F                        | Dukes (R):<br>A = 3<br>B = 18<br>C = 22                                                                                                            | (R):<br>N-ve = 21<br>N+ve = 22                                      | (TP):<br>No previous perioperative treatment = 166                                                                                                                                                                                   | 51 (51)   | Clinical/endoscopic/radiological/histopathological  | Anatomical                                                                           | (TP):<br>CAPR = 110<br>LAR = 8<br>Hartmann's = 1<br>Abdominosacral resection = 3<br>(R):<br>CAPR = 34<br>LAR = 8<br>Hartmann's = 1                      |
| Roodbeen S et al. 2020 <sup>(51)</sup>  | The Netherlands | 7   | Retrospective | N | (TP):<br>64   | 767                                  | (R):<br>21M : 3F                           | (TP):<br>T1 = 23<br>T2 = 196<br>T3 = 421<br>T4 = 52<br>Tx = 4<br>Unknown = 71                                                                      | (TP):<br>N0 = 214<br>N1 = 303<br>N2 = 175<br>Nx = 4<br>Unknown = 71 | (R):<br>Previous neoadjuvant treatment = 17<br>Unknown = 7                                                                                                                                                                           | 24 (24)   | Clinical/biochemical/radiological                   | Regional anatomical (Royal Marsden group) <sup>(11)</sup>                            | (TP):<br>TaTME:<br>APER/ELAPE = 91<br>Hartmann's = 5<br>LAR = 659<br>Proctocolectomy = 12                                                               |
| Safioleas M et al. 2005 <sup>(52)</sup> | Greece          | 13  | Retrospective | N | (TP):<br>64   | 66 (52 had curative resection)       | (TP):<br>29M : 37F                         | <b>Astler-Coller (R):</b><br>B1 = 1<br>B2 = 4<br>C1 = 4<br>C2 = 3<br><br><b>Dukes (R):</b><br>B = 5<br>C = 7                                       | (R):<br>N-ve = 5<br>N+ve = 7                                        | (R):<br>Adjuvant chemoradiotherapy = 11                                                                                                                                                                                              | 12 (12)   | Radiological/histopathological                      | Anatomical                                                                           | (R):<br>LAR = 12                                                                                                                                        |
| Scialpi M et al. 1993 <sup>(53)</sup>   | Italy           | 3   | Prospective   | N | (TP):<br>62.9 | 22                                   | (TP):<br>12M: 10F                          | Astler-Coller (TP):<br>B1=4<br>B2=8<br>C1=1<br>C2=9 (The recurrences were both C2 pre-op)                                                          | (TP):<br>N-ve = 12<br>N+ve = 10<br><br>(R):<br>N+ve = 2             | Not reported                                                                                                                                                                                                                         | 2 (2)     | TRUS/histopathological                              | Anatomical                                                                           | (R):<br>LAR = 2                                                                                                                                         |
| Sinaei M et al. 2013 <sup>(54)</sup>    | Canada          | 11  | Retrospective | Y | (R):<br>61    | 42                                   | (R):<br>26M : 16F                          | Not stated                                                                                                                                         | Not reported                                                        | Not reported                                                                                                                                                                                                                         | 65 (65)   | MRI                                                 | Regional anatomical (Memorial Sloan-Kettering) <sup>(10)</sup> and anatomical        | (R):<br>APER = 16<br>Rectal anastomosis = 26                                                                                                            |
| Suzuki K et al. 1996 <sup>(6)</sup>     | USA             | 7   | Prospective   | Y | (R):<br>62.9  | 65                                   | (R):<br>38M : 27F                          | Astler-Coller (R):<br>A = 6<br>B1 = 18<br>B2 = 11<br>B3 = 1<br>C1 = 4<br>C2 = 14<br>C3 = 3<br>Unknown = 8                                          | (R):<br>N-ve = 36<br>N+ve = 21<br>Unknown = 8                       | Not reported                                                                                                                                                                                                                         | 65 (65)   | CT/CEA/biopsy                                       | Symptoms and fixity (Mayo clinic) <sup>(7)</sup>                                     | (R):<br>LAR = 34<br>APER = 15<br>Local excision = 15<br>Hartmann's = 1                                                                                  |
| Syk E et al. 2008 <sup>(55)</sup>       | Sweden          | 9   | Retrospective | N | (R):<br>73    | 2315                                 | (TP):<br>1340M : 975F<br>(R):<br>89M : 66F | TNM (TP):<br>T1 = 575<br>T2 = 688<br>T3 = 719<br>T4 = 310<br>Unknown 23<br><br>TNM (R):<br>T1 = 14<br>T2 = 52<br>T3 = 70<br>T4 = 17<br>Unknown = 2 | Not reported                                                        | <b>(TP):</b><br><b>Neoadjuvant treatment:</b><br>RT 5x5 Gy + immediate surgery = 1155<br>RT 5x5 Gy + delayed surgery = 114<br>RT 25 x 2 Gy + surgery = 80<br>Chemoradiotherapy + surgery = 32<br><br>No adjuvant radiotherapy = 2315 | 155 (124) | CT/MRI                                              | Regional anatomical                                                                  | (TP):<br>APER = 618<br>LAR = 1362<br>HAR (partial mesorectal excision) = 335<br>(R):<br>APER = 53<br>LAR = 72<br>HAR (partial mesorectal excision) = 30 |

|                                           |                 |    |               |   |                        |                   |                  |                                                                                                                        |                                                 |                                                                                                                                                                                                            |           |                                                                                       |                                                                                                                                       |                                                                    |
|-------------------------------------------|-----------------|----|---------------|---|------------------------|-------------------|------------------|------------------------------------------------------------------------------------------------------------------------|-------------------------------------------------|------------------------------------------------------------------------------------------------------------------------------------------------------------------------------------------------------------|-----------|---------------------------------------------------------------------------------------|---------------------------------------------------------------------------------------------------------------------------------------|--------------------------------------------------------------------|
|                                           |                 |    |               |   |                        |                   |                  |                                                                                                                        |                                                 | (R):Neoadjuvant treatment :<br>RT 5x5 Gy + immediate surgery = 49<br>RT 5x5 Gy + delayed surgery = 6<br>RT 25 x 2 Gy + surgery = 7<br>Chemoradiotherapy + surgery =3<br><br>No adjuvant radiotherapy = 155 |           |                                                                                       |                                                                                                                                       |                                                                    |
| Uehara K et al. 2015 <sup>(56)</sup>      | Japan           | 7  | Retrospective | Y | (R): 66                | 35                | (R): 27M : 8F    | UICC (R):<br>I = 5<br>II = 15<br>III = 14<br>IV = 1                                                                    | (R):<br>N-ve = 20<br>N+ve = 14<br>Unknown = 1   | (R):<br><b>Previous radiotherapy:</b><br>For primary tumour = 2<br>For other disease = 1<br>None = 32                                                                                                      | 35 (35)   | Not stated but CT/MRI/PET-CT for assessment of resectability                          | Regional anatomical (Hruby) <sup>(31)</sup>                                                                                           | (R):<br>Sphincter-preserving = 19<br>Non-sphincter-preserving = 16 |
| Valentini V et al. 1999 <sup>(57)</sup>   | Italy           | 8  | Prospective   | Y | (R): 62                | 47                | (R): 29M : 18F   | Not reported                                                                                                           | Not reported                                    | (R):<br><b>External beam RT:</b><br>Neoadjuvant = 7<br>Adjuvant = 6<br><br>Adjuvant chemotherapy = 6                                                                                                       | 47 (47)   | CT/histopathological                                                                  | Regional anatomical<br>Modified Pilipshen (Memorial Sloan-Kettering) <sup>(58)</sup> and fixity (modified Mayo clinic) <sup>(7)</sup> | (R):<br>LAR = 33<br>APER = 14                                      |
| Vigliotti A et al. 1987 <sup>(58)</sup>   | USA             | 8  | Retrospective | N | (TP): 56               | 105               | (TP): 58M : 47F  | Modified Astler-Coller (R):<br>B2=1<br>B3=4<br>C1=1<br>C2=8<br>C3=1                                                    | (R):<br>N-ve = 5<br>N+ve = 10                   | (R):<br>Adjuvant radiotherapy = 105                                                                                                                                                                        | 23 (23)   | CT/histopathological                                                                  | Anatomical in relation to radiotherapy field                                                                                          | (R):<br>AR = 6<br>CAPR = 9                                         |
| Westberg K et al. 2017 <sup>(59)</sup>    | Sweden          | 7  | Retrospective | Y | (TP): 72               | 149 <sup>5</sup>  | (R): 80M : 69F   | Stage (R):<br>I = 26<br>II = 52<br>III = 68<br>Unknown = 3                                                             | (R):<br>N-ve = 78<br>N+ve = 68<br>Unknown = 3   | (R):<br>Neoadjuvant treatment: None = 93<br>Chemoradiotherapy = 56                                                                                                                                         | 149 (149) | Clinical/radiological/histopathological                                               | Regional anatomical – combination of Leeds <sup>(21)</sup> and Memorial Sloan-Kettering <sup>(10)</sup>                               | (R):<br>APER = 26<br>Hartmann's = 16<br>LAR = 107                  |
| Wieldraaijer et al. 2018. <sup>(60)</sup> | The Netherlands | 7  | Retrospective | N | (TP): 65 <sup>55</sup> | 64* <sup>55</sup> | (TP): 44M : 20F  | Stage (TP):<br>pCR = 1<br>I = 9<br>II = 8,<br>III = 46                                                                 | (TP):<br>N-ve = 18<br>Unknown = 46              | Not reported <sup>55</sup>                                                                                                                                                                                 | 10 (10)   | Clinical/radiological/histopathological/ endoscopic                                   | Regional anatomical                                                                                                                   | (TP):<br>APER = 25<br>LAR = 39                                     |
| Wiig JN et al. 1999 <sup>(61)</sup>       | Norway          | 6  | Prospective   | Y | (R): 65                | 46                | (R): 27M : 19F   | Not reported                                                                                                           | Not reported                                    | Not reported                                                                                                                                                                                               | 77 (77)   | Clinical/radiological (CT)/endoscopic/histopathological                               | Regional anatomical                                                                                                                   | (R):<br>LAR = 46                                                   |
| Wong C et al. 1998 <sup>(62)</sup>        | Canada          | 10 | Retrospective | Y | (R): 55                | 519               | (R): 290M : 229F | TNM (R):<br>T1N0 = 14<br>T2N0 = 59<br>T3-T4N0 = 173<br>T1-T2,N1-N2 = 14<br>T3-T4, N1-N2 = 201<br>Unknown = 58          | (R):<br>N0 = 246<br>N1-N2 = 215<br>Unknown = 58 | (R):<br>No previous adjuvant chemotherapy / irradiation = 519                                                                                                                                              | 519 (519) | Not stated. Histological confirmation = 261                                           | Regional anatomical                                                                                                                   | (R):<br>APER = 326<br>LAR = 151<br>LE/electrocoagulation = 42      |
| Yamada K et al. 2001 <sup>(7)</sup>       | Japan           | 16 | Retrospective | Y | Not reported           | 60                | (R): 38M : 22F   | Dukes (R):<br>A = 7<br>B = 16<br>C = 37                                                                                | (R):<br>N-ve = 23<br>N+ve = 37                  | (R):<br>Most patients received adjuvant chemotherapy<br>Adjuvant radiotherapy = None                                                                                                                       | 60 (60)   | Radiological (CT/MRI/US/bone scintigraphy) and confirmed histopathologically          | Regional anatomical (Yamada et. al) <sup>(8)</sup>                                                                                    | (R):<br>APER = 28<br>Sphincter-sparing = 32                        |
| You Y et al. 2012 <sup>(63)</sup>         | USA             | 18 | Retrospective | Y | (R): 57                | 46                | (R): 22M : 24F   | (R):<br>cT1 = 21<br>cT2 = 3<br>cT3 = 10<br>Unknown = 12<br><br>pT1 = 21<br>pT2 = 11<br>pT3 = 3<br>ypT2 = 7<br>ypT3 = 4 | Not reported                                    | (R):<br>Neoadjuvant chemoradiotherapy: No = 35<br>Yes = 11<br><br>Adjuvant treatment: (chemotherapy/radiation/CR T) = 13                                                                                   | 47 (47)   | First mode of diagnosis: Imaging = 20<br>Endoscopy = 13<br>CEA = 5<br>Pelvic pain = 5 | Anatomical                                                                                                                            | (R):<br>Transanal LE = 46                                          |

|                                       |       |    |               |   |              |      |                                                |                                                                                                                   |                                                                                            |                                                                                                                                                                                 |                                                |                                                                                |                                                                                                       |                                                                                                                           |
|---------------------------------------|-------|----|---------------|---|--------------|------|------------------------------------------------|-------------------------------------------------------------------------------------------------------------------|--------------------------------------------------------------------------------------------|---------------------------------------------------------------------------------------------------------------------------------------------------------------------------------|------------------------------------------------|--------------------------------------------------------------------------------|-------------------------------------------------------------------------------------------------------|---------------------------------------------------------------------------------------------------------------------------|
| Yu T et al.<br>2008 <sup>(64)</sup>   | USA   | 12 | Retrospective | N | (R):<br>55   | 554  | (R):<br>14M : 22F                              | (R):<br>cT1-T2 = 4<br>cT3 = 21<br>cT4 = 7<br>Unknown = 4<br><br>pT1-T2 = 14<br>pT3 = 15<br>pT4 = 4<br>Unknown = 3 | (R):<br>cN0 = 16<br>cN1-2 = 18<br>Unknown = 2<br><br>pN0 = 14<br>pN1-2 = 15<br>Unknown = 7 | Not reported                                                                                                                                                                    | 46 (46)<br>36 patient images<br>available (43) | (R):<br>CT = 36                                                                | According to radiotherapy<br>field                                                                    | (R):<br>APER = 9<br>LE = 8<br>LAR = 12<br>Pelvic exenteration = 2<br>Proctectomy/coloanal<br>anastomosis = 4<br>Other = 1 |
| Yun J et al.<br>2016 <sup>(65)</sup>  | Korea | 14 | Retrospective | N | (R):<br>58   | 2050 | (TP):<br>1233 M: 817F<br><br>(R):<br>84M : 63F | (R):<br>T0 = 2<br>T1 = 3<br>T2 = 22<br>T3 = 111<br>T4 = 9                                                         | (R):<br>N0 = 62<br>N1 = 44<br>N2 = 41                                                      | <b>(R):</b><br><b>Neoadjuvant treatment</b><br>CCRT = 29<br><br><b>Adjuvant chemotherapy</b><br>Yes = 84<br>No = 34<br><br><b>Adjuvant radiotherapy:</b><br>Yes = 67<br>No = 51 | 147 (147)                                      | Radiological (CT,PET-CT,MRI,EUS)/tumour<br>markers/ histopathological          | Regional anatomical<br>(Kusters) <sup>(39)</sup>                                                      | (R):<br>TME - sphincter-preserving =<br>108<br>Non-sphincter-preserving =<br>39                                           |
| Zhao J et al.<br>2012 <sup>(66)</sup> | Japan | 8  | Retrospective | N | (R):<br>59.4 | 1079 | (R):<br>54M :36F                               | (R):<br>I = 6<br>IIA = 8<br>IIB = 11<br>IIIA = 10<br>IIIB = 20<br>IIIC = 26<br>Unknown = 9                        | (R):<br>N-ve = 25<br>N+ve = 56<br>Unknown = 9                                              | (R):<br>Neoadjuvant<br>chemoradiotherapy<br>Yes = 18<br>No = 72                                                                                                                 | 90 (79)                                        | CT/MRI                                                                         | Regional anatomical<br>(Memorial Sloan-Kettering)<br><sup>(10)</sup>                                  | (R):<br>APER = 32<br>AR = 54<br>Hartmann's = 2<br>LE = 2                                                                  |
| Zhu X et al.<br>2016 <sup>(67)</sup>  | Japan | 5  | Retrospective | Y | (R):<br>56   | 135  | (R):<br>73M : 62F                              | TNM (R):<br>T1 = 2<br>T2 = 35<br>T3 = 68<br>T4 = 30                                                               | (R):<br>N0 = 43<br>N1 = 62<br>N2 = 30                                                      | (R):<br>Radiotherapy:<br>Neoadjuvant = 19<br>Adjuvant = 6                                                                                                                       | 135 (135)                                      | Clinical/radiological (CT,PET-CT,MRI,EUS)/tumour<br>markers/ histopathological | Regional anatomical based<br>on Kusters <sup>(39)</sup> & Memorial<br>Sloan-Kettering <sup>(10)</sup> | (R):<br>APER = 78<br>LAR = 57                                                                                             |

**Key:** APR/APER = Abdominoperineal excision of rectum, AR = anterior resection, CAPR = Combined abdominoperineal resection, CCRT = concurrent chemoradiotherapy, EUS = Endorectal Ultrasound, HAR = High anterior resection, IORT = Intra-operative radiotherapy, is = in situ, JSCCR = Japanese Society for Cancer of the Colon and Rectum, Lap = laparoscopic, LAR = low anterior resection, LE = local excision, LLND = lateral lymph node dissection, pCR = pathological complete response, PE = pelvic exenteration, PSD = pelvic sidewall dissection, RT = radiotherapy, TAE = Transanal excision, TaTME = transanal TME, TME = total mesorectal excision, TNM = tumour, node, metastasis, TRUS = Transrectal ultrasound, UICC = Union for International Cancer Control, x = unassessable.

^ = None of these patients developed LR, \* = Japanese patients only included here as Dutch TME trial patients already included above, \*\* = Data unavailable for all patients. Patients with R0 resection status only included, \*\*\* = The total population followed for recurrence, \$ = including 27 patients who had R1 resection at primary surgery, \$\$ = of the total number of patients with all recurrences. 378 patients in total, 64 with recurrence (local and distant) and 10 with LR.

## Figure S1: Search strategy results

Search strategy 28<sup>th</sup> April 2020

### MEDLINE (Pubmed)

(rectal cancer) AND (local recurrence) AND (patterns OR classification OR risk factors)

**Studies identified: 1563**

### EMBASE (OvidSP)

1 (rectal cancer).af.

2 (local recurrence).af.

3 (patterns OR classification OR risk factors).af

4 1 AND 2 AND 3

**Studies identified: 1091**

### Cochrane Central Register of Controlled Trials (CENTRAL)

#1 rectal cancer

#2 local recurrence

#3 patterns OR classification OR risk factors

#4 (#1 AND #2 AND #3)

**Studies identified: 183**

**Trials: 114**

### Science Citation Index Expanded (via the Web of Science)

#1 TS=(rectal cancer)



#2 TS=(local recurrence)

#3 TS=(patterns OR classification OR risk factors)

#4 #1 AND #2 AND #3

**Studies identified: 1140**

**All search results at Endnote: 3908**

**Duplicates: 1891**

**Search results after removal of duplicates: 2017**

**Studies for full-text: 229 [201 abstracts identified and papers located]**

**Studies identified through other sources: 29**

**Articles for full-text review: 230**

**Articles excluded after full-text review with reasons:**

- No English version/translation of paper
- Conference abstracts
- No subclassification of LRRC only 'locally recurrent'
- Some anal/prostatic cancer papers

**Final number of articles for inclusion in analysis: 58**

Figure S2: Study Flow diagram

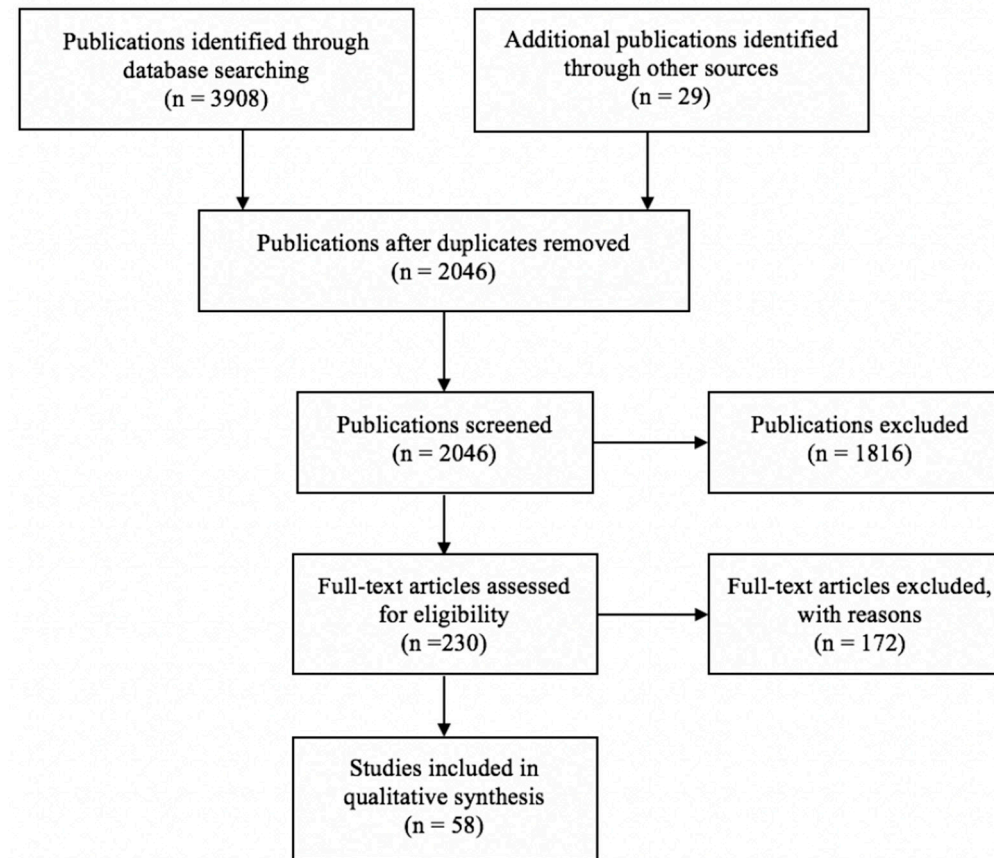

Supplement: s1 [file s1]
